1 **Safety and immunogenicity of four sequential doses of NVX-CoV2373 in adults and**  
2 **adolescents: a phase 3, randomized, placebo-controlled trial (PREVENT-19)**

3 Germán Áñez,<sup>1</sup> Alice McGarry,<sup>1</sup> Wayne Woo,<sup>1</sup> Karen L. Kotloff,<sup>2</sup> Cynthia L. Gay,<sup>3</sup> Mingzhu Zhu,<sup>1</sup>  
4 Shane Cloney-Clark,<sup>1</sup> Joy Nelson,<sup>1</sup> Haoua Dunbar,<sup>1</sup> Miranda R. Cai,<sup>1</sup> Iksung Cho,<sup>1</sup> Zhaohui  
5 Cai,<sup>1</sup> Raj Kalkeri,<sup>1</sup> Joyce S. Plested,<sup>1</sup> Nita Patel,<sup>1</sup> Katherine Smith,<sup>1</sup> Anthony M. Marchese,<sup>1</sup>  
6 Gregory M. Glenn,<sup>1</sup> Raburn M. Mallory,<sup>1</sup> Lisa M. Dunkle,<sup>1</sup> for the 2019CoVn-301 Study  
7 Investigators

8 <sup>1</sup>Novavax, Inc., Gaithersburg, Maryland, USA

9 <sup>2</sup>Center for Vaccine Development and Global Health, University of Maryland School of Medicine,  
10 Baltimore, Maryland, USA

11 <sup>3</sup>Institute for Global Health and Infectious Diseases, University of North Carolina School of  
12 Medicine, Chapel Hill, North Carolina, USA

13

14 **Correspondence:**

15 Lisa M. Dunkle, MD  
16 700 Quince Orchard Road., Gaithersburg, MD 20878  
17 [ldunkle@novavax.com](mailto:ldunkle@novavax.com)  
18 ORCID: 0009-0000-8856-3341  
19

20 **Abbreviations**

21 AE, adverse event; AESI, adverse event of special interest; ELISA, enzyme-linked  
22 immunosorbent assay; hACE2-RBI, human angiotensin-converting enzyme-2 receptor binding  
23 inhibition; GMEU, geometric mean ELISA unit; GMFR, geometric mean fold rise; GMT,  
24 geometric mean titer; LLOQ, lower limit of quantification; MAAE, medically attended adverse  
25 event; nAb, neutralizing antibody; NP, nucleoprotein; PIMMC, potentially immune-mediated  
26 medical condition; PP-IMM, per-protocol immunogenicity; rS, recombinant Spike; SAE, serious  
27 adverse event; SCR, seroconversion rate; TEAE, treatment-emergent adverse event.

28

29 **Article type:** Original Research Article

30 **Abstract word count:** 298/300

31 **Word count:** 3767/5000

32 **Figures/tables (10 limit):** 4/1

33 **References:** 28/50

34

35 **ABSTRACT** [word count: 298/300]

36 **Background**

37 NVX-CoV2373, a recombinant SARS-CoV-2 spike (rS) protein vaccine with Matrix-M™ adjuvant,  
38 has been authorized for use in adults and adolescents. PREVENT-19  
39 (NCT04611802/2019nCoV-301), a pivotal phase 3, randomized, placebo-controlled trial  
40 demonstrated robust efficacy of a primary, 2-dose series of NVX-CoV2373 against COVID-19.

41 **Methods**

42 Protocol expansions to PREVENT-19 included enrollment of adolescents (aged 12 to <18  
43 years) and administration of 3<sup>rd</sup> and 4<sup>th</sup> doses of NVX-CoV2373 to adults and adolescents.  
44 Participants randomized 2:1 received NVX-CoV2373 or placebo 21 days apart; 3<sup>rd</sup> and 4<sup>th</sup> doses  
45 were administered ≥6 months after the preceding dose. Secondary and additional assessments  
46 included post-3<sup>rd</sup>- and 4<sup>th</sup>-dose immune responses (neutralizing antibody [nAb], anti-rS IgG,  
47 human angiotensin-converting enzyme-2–receptor binding inhibition [hACE2-RBI]) and  
48 response durability (post-3<sup>rd</sup> dose) to ancestral virus; cross-reactivity to Omicron subvariants;  
49 safety; and reactogenicity.

50 **Results**

51 Immune responses were observed against ancestral virus after two doses of NVX-CoV2373 but  
52 not after placebo. In both adults and adolescents, additional doses of NVX-CoV2373 increased  
53 nAb titers, anti-rS IgG levels, and hACE2-RBI; durable responses were recorded 8 months post  
54 3<sup>rd</sup> dose. nAb responses post 3<sup>rd</sup> dose were noninferior to those post primary series. Cross-  
55 reactivity to BA.5 and BQ.1.1 variants was also observed, with anti-rS IgG levels post 3<sup>rd</sup> or 4<sup>th</sup>  
56 dose exceeding previously reported correlates of protection. Additional doses of NVX-CoV2373  
57 were well tolerated, with no new safety signals.

58 **Conclusions**

59 NVX-CoV2373 elicited robust and durable humoral immune responses to ancestral SARS-  
60 CoV-2 as a 3<sup>rd</sup> and 4<sup>th</sup> dose after the primary series in adults and adolescents. Cross-reactivity  
61 to relevant variants provides insight into potential protection against antigenically related, but  
62 shifted, viral strains. Additional doses of NVX-CoV2373 were well tolerated with no new safety  
63 signals. These results support the utility of this vaccine platform and continued updates, based  
64 on currently circulating strains, to help effectively combat SARS-CoV-2 infection.

65 **Keywords (3–8):** COVID-19, vaccine, durability, reactogenicity, booster, adolescent

66 **Highlights** (3–5 bullets; 85 characters, including spaces, per bullet)

- 67 • NVX-CoV2373 elicits robust and durable humoral immune responses to SARS-CoV-2
- 68 • 3<sup>rd</sup> and 4<sup>th</sup> subsequent homologous doses are immunogenic and well tolerated
- 69 • NVX-CoV2373 was cross-reactive to variants circulating at the time of this study

70

71

## 72 **1. Introduction**

73 NVX-CoV2373 is a recombinant spike (rS) protein prototype vaccine to ancestral SARS-CoV-2  
74 with a saponin-based adjuvant (Matrix-M™) that was authorized for use in adults and  
75 adolescents in the United States (US), and many other regions, for primary vaccination and  
76 additional homologous or heterologous doses.<sup>1,2</sup> An updated version, NVX-CoV2601, contains  
77 XBB.1.5 rS and was authorized in 2023–2024 for use in people aged ≥12 years.<sup>2,3</sup> In 2024, the  
78 World Health Organization and US Centers for Disease Control and Prevention estimates  
79 suggested that XBB.1.5-based COVID-19 vaccines were effective against symptomatic SARS-  
80 CoV-2 infection, including cross protection.<sup>4,5</sup> Based on SARS-CoV-2 variant evolution, another  
81 COVID-19 vaccine update was initiated for 2024–2025, targeting the JN.1-lineage,<sup>6</sup> resulting in  
82 updated authorizations/approvals,<sup>7</sup> including for the Novavax COVID-19 vaccine. Despite the  
83 availability of updated formulations, immunogenicity of repeated homologous prototype  
84 vaccinations remains relevant in the context of cross-protection among variants and durability of  
85 humoral immune responses.

86 Prefusion Protein Subunit Vaccine Efficacy Novavax Trial–COVID-19 (PREVENT-19),  
87 was a pivotal phase 3, randomized, placebo-controlled, multicenter clinical trial of NVX-  
88 CoV2373 conducted in ~30,000 adults in the US and Mexico (NCT04611802/2019nCoV-301).  
89 The primary objective was met with 90% vaccine efficacy against mild, moderate, or severe  
90 COVID-19.<sup>8</sup> Additional analyses demonstrated 100% efficacy against moderate-to-severe  
91 disease and hospitalization ≥7 days after the 2<sup>nd</sup> dose.<sup>8,9</sup> No preliminary safety concerns were  
92 raised, with a median 2-month safety follow-up.

93 A pediatric expansion was initiated in April 2021 to enroll adolescents (aged 12 to <18  
94 years) in the US; preliminary safety, immunogenicity, and efficacy were demonstrated in an  
95 interim report.<sup>10</sup> Additionally, to align with evolving public health recommendations, protocol  
96 amendments allowed participants who completed an NVX-CoV2373 primary series to receive a

97 3<sup>rd</sup> dose and subsequent 4<sup>th</sup> dose. This report describes immunogenicity and safety results from  
98 adults and adolescents enrolled in PREVENT-19, including outcomes from participants who  
99 received additional doses of NVX-CoV2373. Immunogenicity against the ancestral strain and  
100 cross-reactivity against viral variants predominant at the time of this report are included.

## 101 **2. Methods**

### 102 *2.1. Study design*

103 Enrollment criteria for adult<sup>8</sup> and adolescent (aged 12 to <18 years)<sup>10</sup> participants were  
104 described previously. Participants were randomized 2:1 to receive two intramuscular injections  
105 of either NVX-CoV2373 or placebo 21 days apart (**Figure S1**). After accrual of safety data to  
106 support Emergency Use Authorization, participants could opt in for the blinded crossover and  
107 receive alternate treatment from their original randomization group. Adult participants in study  
108 follow-up for  $\geq 6$  months ( $\geq 5$  months for adolescents) after receipt of the NVX-CoV2373 primary  
109 series were eligible for a 3<sup>rd</sup> dose (open label); a 4<sup>th</sup> dose was offered at select sites  $\geq 6$  months  
110 later.

### 111 *2.2. Objectives*

112 Results of primary efficacy, initial safety, and some secondary objectives post primary series in  
113 adults and adolescents have been reported previously.<sup>8,10</sup> Final adult safety outcomes, as well  
114 as updated immunogenicity and safety analyses post–primary series dosing and outcomes and  
115 after 3<sup>rd</sup> and 4<sup>th</sup> doses in adults and adolescent participants are reported here. Secondary  
116 immunogenicity objectives were neutralizing antibody (nAb) titers, serum IgG levels, and human  
117 angiotensin-converting enzyme-2 (hACE2) receptor-binding inhibition (RBI) before and 14 days  
118 after (day 35) the NVX-CoV2373 primary series. The 14-day timepoint for the primary series  
119 was used in this study based on timing in pivotal COVID-19 vaccine trials in the height of the  
120 pandemic.<sup>8,11</sup> Immune responses 28 days after the 3<sup>rd</sup> and 4<sup>th</sup> doses and comparison of these to  
121 the primary series responses were assessed.

122 Safety assessment included collection of solicited local and systemic reactogenicity for 7  
123 days after each study dose and incidence and severity of unsolicited adverse events (AEs) for  
124 28 days after each study dose. Overall safety included frequency and severity of treatment-  
125 related medically attended AEs (MAAEs), AEs of special interest (AESI), serious AEs (SAEs),  
126 and death due to any cause throughout study follow-up.

### 127 *2.3. Procedures*

128 Participants received NVX-CoV2373 (5 µg SARS-CoV-2 rS protein and 50 µg Matrix-M  
129 adjuvant) via a 0.5-mL intramuscular injection. Blood samples for measurement of serum  
130 antibody responses were collected on day 0 (before the 1<sup>st</sup> dose), day 35 (14 days following the  
131 2<sup>nd</sup> dose), and before and 28 days after the 3<sup>rd</sup> and 4<sup>th</sup> doses. Blood samples and nasal swabs  
132 were obtained from participants before the primary series, 3<sup>rd</sup>, and 4<sup>th</sup> doses to determine  
133 serologic and virologic status (SARS-CoV-2 anti-nucleoprotein [NP] serum antibodies [Elecsys<sup>®</sup>  
134 Anti-SARS-CoV-2 assay; University of Washington, Seattle, WA, USA]; SARS-CoV-2 RT-PCR  
135 [Abbott Real Time Quantitative SARS-CoV-2 assay; University of Washington, Seattle, WA,  
136 USA]).

137 Reactogenicity (solicited AEs) data were documented by participants via an eDiary for 7  
138 days after dosing. Unsolicited treatment-emergent AEs (TEAEs) were collected through 28 days  
139 after each study dose; treatment-related MAAEs, AESI, SAEs, and death (any cause) were  
140 documented by study investigators through end of study.

### 141 *2.4. Assessments*

142 Serum was analyzed with validated assays for: nAbs specific to ancestral SARS-CoV-2 (via a  
143 microneutralization inhibitory concentration of 50% [MN<sub>50</sub>]; 360biolabs, Melbourne, Australia),<sup>12</sup>  
144 anti-rS IgG antibody levels via enzyme-linked immunosorbent assay (ELISA) as geometric  
145 mean ELISA units (GMEUs),<sup>13</sup> and hACE2 RBI antibodies to rS protein<sup>14</sup> (both assays; Novavax

146 Clinical Immunology, Gaithersburg, MD, USA). Fit-for-purpose assays were used for anti-rS IgG  
147 and nAbs against variant strains (ie, BA.5, BQ.1.1).<sup>15</sup>

148 Solicited AEs were summarized by local/systemic symptom and maximum severity.  
149 Unsolicited AEs were coded using the Medical Dictionary for Regulatory Activities (MedDRA)  
150 version 25.0. AEs were categorized by severity and relationship to the study vaccine.

## 151 *2.5. Statistical analyses*

152 The per-protocol immunogenicity (PP-IMM) analysis sets for each dose included participants  
153 with both a baseline (pre-dose) and  $\geq 1$  post-dose sample and no exclusionary protocol  
154 violations. Participants with RT-PCR–positive nasal swabs and/or anti-NP seropositivity for  
155 SARS-CoV-2 from baseline to day 35 and/or through 28 days after the 3<sup>rd</sup> or 4<sup>th</sup> study dose  
156 were excluded from PP-IMM analyses. All statistical analyses were performed using SAS<sup>®</sup>  
157 version 9.4 or higher (SAS Institute, Cary, NC).

158 Geometric means were defined as the antilog of the mean of the log-transformed values.  
159 Geometric mean fold rise (GMFR) was defined as the ratio of post-dose to pre-dose geometric  
160 mean values within a study group. Data were summarized by trial vaccine group using 95% CI,  
161 calculated based on the *t*-distribution of the log-transformed values for geometric means or  
162 GMFR, then back-transformed to the original scale for presentation. For ratio calculations,  
163 concentration values below the lower limit of quantification (LLOQ) were replaced by 0.5 ×  
164 LLOQ. Seroconversion rate (SCR) was defined as a percentage of participants with a  $\geq 4$ -fold  
165 higher antibody level post versus pre-dose. The SCR 95% CIs were calculated using the exact  
166 Clopper–Pearson method.

167 Noninferiority of the 3<sup>rd</sup>-dose response to that following the primary series was assessed  
168 by comparing the nAb titers 28 days after the 3<sup>rd</sup> dose with the response obtained 14 days after  
169 the primary series. To establish noninferiority, the following criteria were to be met: lower bound  
170 of two-sided 95% CI for the ratio of GMTs ( $\text{GMT}_{\text{third}}/\text{GMT}_{\text{primary}} > 1.0$ ) and lower bound of the two-

171 sided 95% CI for the difference of SCR ( $SCR_{\text{third}} - SCR_{\text{primary}}$ )  $> -10\%$ . The 95% CI for SCR  
172 difference was calculated using the Tango method. Serum samples from randomly selected  
173 adult and adolescent PP-IMM subsets, who received all four doses, were used to assess  
174 immune responses against ancestral SARS-CoV-2 and variants at the specified time points.

175 The safety analysis sets included all participants who received  $\geq 1$  primary series study  
176 dose and were analyzed according to study material received; participants in the 3<sup>rd</sup>- and 4<sup>th</sup>-  
177 dose safety sets must have received these respective additional vaccinations. Reactogenicity  
178 data are reported for participants in the safety analysis set with  $\geq 1$  eDiary entry for the  
179 associated dose. Safety data were summarized descriptively, and no statistical tests were  
180 performed. Unsolicited AEs were reported by number and percentage, with corresponding exact  
181 95% CI using the Clopper–Pearson method.

## 182 *2.6. Ethical oversight*

183 This study was performed in accordance with the International Conference on Harmonization  
184 Good Clinical Practice guidelines and overseen by the NIAID DSMB. The protocol,  
185 amendments, and overall oversight were provided by institutional review boards, research  
186 ethics committees, and the National Institute of Allergy and Infectious Disease (NIAID) Data  
187 Safety and Monitoring Board (DSMB), according to local regulations. Written informed consent  
188 was received from all participants before enrollment.

## 189 **3. Results**

### 190 *3.1. Study populations*

191 Adult participants (N=29,943; screened from 27 December 2020 to 18 February 2021) were  
192 randomized to receive NVX-CoV2373 (N=19,961) or placebo (N=9982); 713 and 337  
193 participants were included in the respective PP-IMM analysis sets (**Figure 1A**). After crossover,  
194 226 and 160 adult participants were in the 3<sup>rd</sup>- and 4<sup>th</sup>-dose sets, respectively (**Figure 1B**). Of



195 2247 adolescent participants, 1491 and 756, respectively, were randomized to receive NVX-  
196 CoV2373 and placebo (PP-IMM sets: 1126 and 537); there were 122 and 27 adolescent  
197 participants analyzed for immunogenicity after the 3<sup>rd</sup> dose and 4<sup>th</sup> dose, respectively  
198 **(Figure 1)**.

199 Demographic characteristics were comparable among treatment arms within adult PP-  
200 IMM **(Table 1)** and safety **(Table S1)** sets, other than a higher proportion of 18- to 64-year-old  
201 participants in the adult PP-IMM set who received a 3<sup>rd</sup> dose, compared to other doses;  
202 characteristics were also comparable among treatment arms within the adolescent sets. Adult  
203 and adolescent participants received 3<sup>rd</sup> or 4<sup>th</sup> doses after a median of 6–12 months following  
204 the preceding dose **(Figure S1)**.

### 205 *3.2. Immunological responses to the ancestral strain in adults and adolescents*

206 nAb (MN<sub>50</sub>) GMTs to the ancestral strain in adults rose from 11 to 1083 in the NVX-  
207 CoV2373 group (GMFR, 103 [95% CI, 92.4–115.6]) from day 0 to day 35 **(Figure 2A)**. No  
208 antibody response was detected in placebo-recipients from a baseline GMT of 10. Day 35 SCRs  
209 were 94% with NVX-CoV2373 versus 2% with placebo. Additional doses of NVX-CoV2373  
210 increased titers from pre-dose to 28 days post dose for both the 3<sup>rd</sup> and 4<sup>th</sup> doses, resulting in  
211 nAb titers greater than those observed 14 days post primary series. Similar response trends  
212 were observed across doses of NVX-CoV2373 in the adolescent population **(Figure 2B)**.  
213 Noninferiority was achieved for the nAb response 28 days after the 3<sup>rd</sup> dose compared to 14  
214 days after the primary series (GMTR and SCR difference) in both the adult and adolescent  
215 populations **(Figure 2C)**.

216 In adults, anti-rS IgG GMEUs rose from 119 to 49,384 in the NVX-CoV2373 group  
217 (GMFR, 414 [368.8–464.2]) from day 0 to 35 versus no apparent change from day 0 (GMEU,  
218 108) in the placebo group (GMFR, 1.2 [95% CI, 1.1–1.3]) **(Figure S2A)**. GMEUs also  
219 substantially increased from pre-dose to 28 days post 3<sup>rd</sup> and 4<sup>th</sup> doses. Adolescent participants  
220 had low baseline GMEUs on day 0 and a robust increase on day 35 post active vaccination

221 **(Figure S2B)**. Titers remained high with subsequent doses. hACE2 RBI GMTs followed a  
222 similar pattern as nAb and serum IgG responses in both adults **(Figure S3A)** and adolescents  
223 **(Figure S3B)**. Immunological responses after the primary series among participants regardless  
224 of baseline serostatus were comparable to those in the baseline seronegative PP-IMM sets  
225 across each of the assays **(Figure S4)**.

226 Durability of immunogenic response was assessed 4- and 8-months post 3<sup>rd</sup> dose in  
227 subsets of the PP-IMM populations. Importantly, nAb, anti-rS IgG, and hACE2 RBI responses to  
228 the ancestral strain were preserved at levels comparable to those recorded 28 days after the 3<sup>rd</sup>  
229 dose **(Figure S5)**. Titers remained elevated from baseline and there were only minor declines in  
230 GMFR and SCRs through 8 months post 3<sup>rd</sup> dose.

### 231 *3.3. Immunological responses to the ancestral strain in adult age subgroups*

232 Baseline nAb, serum IgG, and hACE2 RBI values were similar (within each assessment)  
233 among participants aged 18 to <65 years and ≥65 years in both treatment groups **(Table S2)**.  
234 Fourteen days after the primary series, the nAb titers in the NVX-CoV2373 group were ~1.4-fold  
235 higher in participants aged 18 to <65 years (123.8 [107.1–143.1]) compared with those aged  
236 ≥65 years (86.1 [72.6–102.1]). Increases in serum IgG and hACE2 RBI titers on day 35 followed  
237 a similar trend. SCRs from day 0 to day 35 for each of the response measures were comparable  
238 among the adult age groups. Immune responses in adults who received a 3<sup>rd</sup> and/or 4<sup>th</sup> dose of  
239 NVX-CoV2373 were similar in younger and older adults **(Table S3)**.

### 240 *3.4. Cross-reactivity of NVX-CoV2373 against Omicron subvariants*

241 nAb responses (ID<sub>50</sub>) to BA.5 and BQ.1.1 were assessed in a PP-IMM subset of adult  
242 participants who received all four study doses of NVX-CoV2373. Fourteen days after the  
243 primary series, responses that cross-reacted with variant strains were ~100-fold lower than  
244 those against the ancestral strain; however, activity increased against each variant with  
245 subsequent doses of NVX-CoV2373 **(Figure 3A)**.

246 Cross-reactive serum anti-rS IgG responses were observed in adults against BA.5 and  
247 BQ.1.1 after the primary series (~4-fold lower than against the ancestral virus) and subsequent  
248 doses (~1.5-fold lower than those against ancestral virus; **Figure 3B**). Anti-rS IgG levels against  
249 the ancestral strain and variants aligned with correlates of protection of >88% (based on day 35  
250 anti-rS IgG levels and protection 56 days later), as described previously.<sup>16</sup> Anti-rS IgG  
251 responses were also assessed based on positive or negative SARS-CoV-2 NP serostatus at  
252 baseline, and a similar trend was observed as those described for the full immunogenicity  
253 subset (**Figure 3C**).

### 254 3.5. Reactogenicity

255 Overall, solicited AEs were predominantly mild to moderate in severity and self-limited. Events  
256 occurred at a somewhat higher frequency after the 3<sup>rd</sup> and 4<sup>th</sup> doses compared with the first two  
257 doses (**Figure 4A; Table S4**). Solicited AEs were reported most frequently within 2 days after  
258 vaccination and lasted a median 1–3 days; there were a limited number of AEs lasting >7 days  
259 post injection (**Table S5**). Frequencies of solicited local AEs across doses trended similarly in  
260 both the adult and adolescent study populations; following each dose, pain and tenderness  
261 were the most common (>10%). Any solicited systemic AEs also occurred with similar frequency  
262 among the adult and adolescent study populations (**Figure 4B; Table S4**). Fatigue, headache,  
263 malaise, and muscle pain were the most common (>40% for any dose) solicited systemic AEs  
264 reported.

### 265 3.6. Unsolicited AEs

266 Through 28 days after the primary series, unsolicited AEs occurred at similar frequencies within  
267 the adult and adolescent populations in the NVX-CoV2373 (12.1% and 15.8%, respectively) and  
268 placebo (11.6% and 16.0%) groups (**Table S6**). Frequency of unsolicited AEs decreased with  
269 the 3<sup>rd</sup> and 4<sup>th</sup> doses of NVX-CoV2373 in both adults and adolescents. After the 4<sup>th</sup> dose, no  
270 adults and one (0.5%) adolescent participant had a vaccine-related AE (urticaria). Overall, there  
271 was minimal occurrence of vaccine-related or severe AEs, as well as MAAEs, SAEs, and

272 PIMMCs. During primary series follow-up, six adult participants discontinued the study for an  
273 unsolicited AE considered related to study vaccination. After unblinding, it was determined these  
274 were four and two participants in the active vaccine and placebo groups, respectively. At the  
275 data cutoff date, there were no unsolicited AEs leading to discontinuation in adolescent  
276 participants. No deaths during the study were considered related to vaccination, and there were  
277 no deaths in the adolescent population.

#### 278 **4. Discussion**

279 These results expand on previous reports of the PREVENT-19 trial<sup>8,10</sup> and support phase 3  
280 data<sup>17</sup> that demonstrated the safety and efficacy of two primary doses of NVX-CoV2373 in  
281 adults and adolescents. Immunological responses to ancestral SARS-CoV-2 were markedly  
282 increased 14 days after two primary doses of NVX-CoV2373 in participants serologically  
283 negative for SARS-CoV-2 NP. Responses were durable, with continued robust humoral  
284 responses after a 3<sup>rd</sup> dose of NVX-CoV2373 and modest increases after a 4<sup>th</sup> dose. Over the full  
285 period of the study, antibody titers were sustained in the range associated with a high degree of  
286 protective efficacy.<sup>16</sup> Overall, NVX-CoV2373 was immunogenic in both younger and older adults  
287 and adolescents and was well tolerated.

288 In both adults and adolescents, immunological response to a 3<sup>rd</sup> dose of NVX-CoV2373  
289 was noninferior to that observed 14 days after the primary series. A median of 8 months after  
290 the 3<sup>rd</sup> dose, a 4<sup>th</sup> dose of NVX-CoV2373 resulted in elevated nAb titers comparable to those  
291 post 3<sup>rd</sup> dose, and >4-fold higher than those observed 28-days post primary series. These  
292 positive 3<sup>rd</sup>-dose responses are in line with those previously reported from a phase 2 trial.<sup>18</sup> nAb  
293 titers before the 3<sup>rd</sup> and 4<sup>th</sup> doses were higher than those reported on Day 0, indicating response  
294 durability. Notably, there was some decline in titers, indicative of waning immunity; however, this  
295 can be expected as it would align with previously reported waning vaccine efficacy (to Delta  
296 variants) >120 days post vaccination.<sup>19</sup> Although mRNA COVID-19 vaccines have generally

297 reported higher absolute post-vaccination IgG levels and neutralization titers, other studies have  
298 demonstrated significantly better persistence of response with NVX-CoV2373, with a slower  
299 decline in immune responses.<sup>20</sup> These data support the rationale for periodic reimmunization to  
300 help combat breakthrough infection in vaccinated individuals, especially with the frequent  
301 emergence of new variant strains.

302 Overall, AEs were mild to moderate and reactogenicity was generally transient.  
303 Incidence and severity of local and systemic reactogenicity moderately increased following the  
304 2<sup>nd</sup> dose and remained relatively consistent after both the 3<sup>rd</sup> dose and 4<sup>th</sup> dose. These findings  
305 align with early studies during the pandemic where a COVID-19 vaccine primary series (ie,  
306 mRNA, adenoviral vector, and protein-based) was observed to generally elicit higher  
307 frequencies of reactogenic symptoms following the 2<sup>nd</sup> dose compared to the 1<sup>st</sup> dose.<sup>11,21,22</sup>  
308 Side effects from COVID-19 vaccines have been identified as a driving force of vaccine  
309 hesitancy;<sup>23,24</sup> therefore, a key observation from this study may be that additional doses of NVX-  
310 CoV2373 in adult and adolescent populations did not further increase reactogenic symptom  
311 frequency. Here, unsolicited AE frequency after the primary series was comparable in the NVX-  
312 CoV2373 and placebo groups and incidence appeared to plateau after the 4<sup>th</sup> dose, which is  
313 consistent with data from a phase 2 study conducted in Australia and the US.<sup>21</sup> Notably, the  
314 solicited and unsolicited AE outcomes after repeat dosing with NVX-CoV2373 are reassuring for  
315 future recommendations of additional doses of the Novavax COVID-19 vaccine, based on  
316 updated formulations that are expected due to continued SARS-CoV-2 strain circulation and  
317 evolution.

318 A tolerable safety profile, immunogenicity, and protection from infection in older adults is  
319 of great interest for COVID-19 vaccines due to the higher risk of severe disease complications  
320 in those aged  $\geq 65$  years.<sup>25</sup> No safety concerns were raised, and high and similar immune  
321 responses were observed across age groups; however, as expected, titers were lower in the  
322 older versus younger adult population, and titers were higher for the adolescent versus adult

323 populations. Notably, in both age groups, responses were within the range demonstrated to  
324 provide protective efficacy.<sup>16</sup> This is an important consideration, as real-world evidence  
325 indicates that vaccine side effects are a key factor in selection of a specific vaccine formulation  
326 when efficacy among the options is comparable.<sup>26</sup> Overall, the decision for use of a protein- or  
327 mRNA-based vaccine formulation should consider patient characteristics/comorbidities and  
328 individual preference (eg, vaccine hesitancy due to side effects), as well as immunogenicity.

329 Cross-protective humoral immune responses were observed against Omicron variants  
330 BA.5 and BQ.1.1. Over time, SARS-CoV-2 lineages have evolved, attaining increased fitness  
331 and immune evasion capabilities, compared to the ancestral strain and early Omicron variants.  
332 For example, additional mutations in the viral spike protein may promote improved replication in  
333 respiratory cells, decreased affinity for ACE2, and antibody resistance.<sup>27</sup> A 3<sup>rd</sup> dose of  
334 NVX-CoV2373 elicited a robust serum IgG response to BA.1 with an SCR comparable to that  
335 observed after the primary series. These data are in line with those from a phase 2 study of a  
336 smaller South African population, where elevated titers against BA.1 and BA.4/5 were observed  
337 after 3<sup>rd</sup> and 4<sup>th</sup> doses of NVX-CoV2373.<sup>28</sup> These immunogenicity results provide supportive  
338 evidence for this protein-based vaccine platform's capacity to elicit broadly cross-reactive nAb  
339 titers against antigenically distant SARS-CoV-2 variant strains.

340 This study was conducted during the early years of what has become a continuously  
341 evolving epidemiology of SARS-CoV-2. At study initiation, virtually all participants were  
342 infection-naive, and ancestral virus, as well as some early antigenically related variants, were  
343 circulating. During the second year, more antigenically divergent variants emerged (eg, BA.1,  
344 BA.5, and BQ.1.1), reducing immunity among individuals vaccinated with authorized prototype  
345 vaccines. This led to recommendations for “booster” doses of the prototype vaccine, followed by  
346 updated vaccine formulations that targeted newer variants. For the 2023–2024 season,  
347 vaccines based on the XBB.1.5 variant became available.<sup>2,3</sup> JN.1, followed by strains within that  
348 lineage (ie, KP.2 and KP.3), then became the dominant strains, and two mRNA-based vaccines

349 and the Novavax COVID-19 vaccine were authorized/approved as updated COVID-19 vaccines  
350 for the 2024–2025 season.<sup>7</sup> In non-clinical models, the updated Novavax COVID-19 vaccine  
351 (NVX-CoV2705 [JN.1]) generated broad cross-neutralizing responses against JN.1-lineage  
352 subvariants, including KP.2 and KP.3.<sup>29</sup> The continued authorizations, preclinical data, and  
353 assessments with convalescent serum samples suggest consistency for immunogenicity and  
354 effectiveness of updated Novavax COVID-19 vaccines with this platform.

355 Immune responses described here demonstrate cross-reactivity of the prototype vaccine  
356 with genetic variants that had deviated from ancestral SARS-CoV-2. It can be expected that  
357 immunogenicity of prototype vaccines would decline as new strains emerge and antigenic  
358 distance grows. For example, based on genomic composition, early Omicron strains (eg, BA.1,  
359 BA.5, and BQ.1) may be considered one antigenically related “family”, followed by a larger shift  
360 to XBB-related strains that are more antigenically distinct from ancestral SARS-CoV-2.<sup>30</sup>  
361 Notably, within these ‘antigenic families’ of variants, cross-reactivity to updated vaccines may be  
362 more likely.

363 A separate analysis of data from PREVENT-19 reported that nAb titers provide a  
364 correlate of protection for NVX-CoV2373 against ancestral virus,<sup>16</sup> and a more recent analysis<sup>19</sup>  
365 confirmed antibody levels to the immune-evading Delta variant that support protective efficacy.  
366 This vaccine platform also demonstrated cross-reactivity in the 2019nCoV-313/NCT05975060  
367 study investigating an updated version of NVX-CoV2373 directed to XBB.1.5 (NVX-CoV2601),  
368 [*in press*], which was authorized for use in 2023–2024.<sup>2,3</sup> In that study, nAb responses to JN.1  
369 and KP.2 were observed in previously vaccinated participants (≥3 doses of an mRNA-based  
370 COVID-19 vaccine) who received one dose of NVX-CoV2601. Cross-reactivity against SARS-  
371 CoV-2 variants by vaccines generated using this platform may be related to unique platform  
372 attributes, such as the saponin-based Matrix-M adjuvant and/or greater accessibility to highly  
373 conserved spike protein epitopes due to the truncated glycans of glycoproteins produced in the  
374 baculovirus expression vector system.<sup>31</sup> Matrix-M adjuvant likely broadens epitope recognition<sup>32</sup>

375 and elicits a Th1-dominant immune response capable of improving humoral immune  
376 responses<sup>33</sup>. Despite the continued evolution of SARS-CoV-2, the ancestral vaccine and strain  
377 responses analyzed in this study allow for the interpretation of cross-reactivity specific to this  
378 vaccine platform, which can provide insight into potential performance of updated vaccine  
379 formulations against antigenically distant future-drifted strains.

## 380 **5. Conclusions**

381 In conclusion, NVX-CoV2373 elicited robust and durable humoral immune responses to  
382 SARS-CoV-2, as well as cross-protective responses to key variants. Doses of NVX-CoV2373  
383 beyond the primary series induced spike-specific antibodies, with an acceptable reactogenicity  
384 profile. These results support continuing updates to this vaccine platform based on currently  
385 circulating strains to help effectively combat SARS-CoV-2 infection.

386

387

388



## 389 **Acknowledgments**

390 We especially thank each of the study participants who volunteered for this study, as well as the  
391 2019nCoV-301 Study Group members.<sup>8,10</sup> We acknowledge the funders (BARDA and  
392 NIAID/NIH), the members of the NIAID Data and Safety Monitoring Board (DSMB), community  
393 leadership groups throughout the country who assisted with community engagement and  
394 recruitment, unnamed colleagues at each of the sites who generously contributed to the trials in  
395 many ways, and all unnamed colleagues at Novavax, Inc, who worked tirelessly and gave  
396 unlimited efforts to the development, testing, and support of this trial. Medical writing support  
397 was provided by Kelly Cameron, PhD, CMPP, Kelly M. Fahrbach, PhD, CMPP, with editorial  
398 support from Ebenezer M. Awuah-Yeboah, BS, all of Ashfield MedComms (New York, USA), an  
399 Inizio company, supported by Novavax, Inc.

## 400 **Appendix A:** Supplementary data

401 Supplementary study results.

402 **Funding:** This work was supported by Novavax, Inc.; the Office of the Assistant Secretary for  
403 Preparedness and Response, Biomedical Advanced Research and Development Authority  
404 (BARDA; contract Operation Warp Speed: Novavax Project Agreement number 1 under Medical  
405 CBRN [Chemical, Biological, Radiological, and Nuclear] Defense Consortium base agreement  
406 no. 2020-530; Department of Defense no. W911QY20C0077); and the National Institute of  
407 Allergy and Infectious Diseases (NIAID), National Institutes of Health. The NIAID provides grant  
408 funding to the HIV Vaccine Trials Network (HVTN) Leadership and Operations Center (UM1  
409 AI68614), the HVTN Statistics and Data Management Center (UM1 AI68635), the HVTN  
410 Laboratory Center (UM1 AI68618), the HIV Prevention Trials Network Leadership and  
411 Operations Center (UM1 AI68619), the AIDS Clinical Trials Group Leadership and Operations  
412 Center (UM1 AI68636), and the Infectious Diseases Clinical Research Consortium leadership  
413 group (UM1 AI148684).

414 **Data Statement:** Study details can be found at <https://clinicaltrials.gov/study/NCT04611802>.

415 Data that support the findings of this study are available in supplementary material and from the  
416 corresponding author upon reasonable request.

#### 417 **Declaration of Competing Interest**

418 Karen L. Kotloff reports financial support was provided by Novavax, Inc. and the National  
419 Institute of Allergy and Infectious Diseases. Cynthia L. Gay reports financial support was  
420 provided by National Institute of Allergy and Infectious Diseases. Alice McGarry, Wayne Woo,  
421 Mingzhu Zhu, Shane Cloney-Clark, Joy Nelson, Haoua Dunbar, Miranda R. Cai, Iksung Cho,  
422 Zhaohui Cai, Raj Kalkeri, Joyce S. Plested, Nita Patel, Katherine Smith, Anthony M. Marchese,  
423 and Raburn M. Mallory report a relationship with Novavax, Inc. that includes: employment and  
424 equity or stocks. German Anez reports a relationship with Novavax, Inc that includes:  
425 employment (former) and equity or stocks. Gregory Glenn reports a relationship with Novavax,  
426 Inc. that includes: consulting or advisory, employment (former), and equity or stocks. Lisa  
427 Dunkle reports a relationship with Novavax, Inc. that includes: consulting or advisory,  
428 employment (former), and equity or stocks. Karen L. Kotloff reports a relationship with Novavax,  
429 Inc. that includes: funding grants. Medical writing support was funded by Novavax, Inc. If there  
430 are other authors, they declare that they have no known competing financial interests or  
431 personal relationships that could have appeared to influence the work reported in this paper.

#### 432 **Ethics Approval Statement**

433 The study was performed in accordance with the International Conference on Harmonization  
434 Good Clinical Practice guidelines and overseen by the NIAID Data Safety and Monitoring Board.

#### 435 **Patient Consent Statement**

436 All participants provided written informed consent before enrollment.

437

438

## 439 **Author contributions**

440 **Germán Áñez:** conceptualization, methodology, formal analysis, investigation, writing – original draft  
441 preparation, writing – reviewing and editing

442 **Alice McGarry:** formal analysis, investigation, writing – reviewing and editing

443 **Wayne Woo:** formal analysis, investigation, writing – reviewing and editing

444 **Karen L. Kotloff:** data curation, investigation, writing – reviewing and editing; resources

445 **Cynthia L. Gay:** data curation, investigation, writing – reviewing and editing; resources

446 **Mingzhu Zhu:** writing – reviewing and editing; resources

447 **Shane Cloney-Clark:** formal analysis, writing – reviewing and editing

448 **Joy Nelson:** writing – reviewing and editing; project administration

449 **Haoua Dunbar:** data curation, writing – reviewing and editing

450 **Miranda R. Cai:** formal analysis, writing – reviewing and editing

451 **Iksung Cho:** formal analysis, investigation, writing – reviewing and editing, software

452 **Zhaohui Cai:** formal analysis, writing – reviewing and editing

453 **Raj Kalkeri:** investigation, writing – reviewing and editing

454 **Joyce S. Plested:** formal analysis, writing – reviewing and editing

455 **Nita Patel:** resources, writing – reviewing and editing

456 **Katherine Smith:** formal analysis, writing – reviewing and editing

457 **Anthony M. Marchese:** writing – updated draft preparation, writing – reviewing and editing

458 **Gregory M. Glenn:** methodology, investigation, writing – reviewing and editing

459 **Raburn M. Mallory:** methodology, formal analysis, writing – reviewing and editing

460 **Lisa M. Dunkle:** conceptualization, methodology, formal analysis, investigation, writing – reviewing and  
461 editing, writing – original draft preparation

462

463

464

## 465 References

- 466 1.COVID-19 Vaccine Tracker. Novavax: Nuvaxovid  
467 <https://covid19.trackvaccines.org/vaccines/25/>. Accessed January 16, 2024.
- 468 2.Food and Drug Administration. Novavax COVID-19 Vaccine, Adjuvanted. Available online 17  
469 October 2023. [https://www.fda.gov/vaccines-blood-biologics/coronavirus-covid-19-cber-](https://www.fda.gov/vaccines-blood-biologics/coronavirus-covid-19-cber-regulated-biologics/novavax-covid-19-vaccine-adjuvanted)  
470 [regulated-biologics/novavax-covid-19-vaccine-adjuvanted](https://www.fda.gov/vaccines-blood-biologics/coronavirus-covid-19-cber-regulated-biologics/novavax-covid-19-vaccine-adjuvanted). Accessed January 31, 2024.
- 471 3.European Medicines Agency. Nuvaxovid. COVID-19 Vaccine (recombinant, adjuvanted).  
472 [https://www.ema.europa.eu/en/medicines/human/EPAR/nuvaxovid#ema-inpage-item-](https://www.ema.europa.eu/en/medicines/human/EPAR/nuvaxovid#ema-inpage-item-product-info)  
473 [product-info](https://www.ema.europa.eu/en/medicines/human/EPAR/nuvaxovid#ema-inpage-item-product-info). Accessed February 1, 2024.
- 474 4.World Health Organization. Updated Risk Evaluation of JN.1, 15 April 2024.  
475 [https://www.who.int/docs/default-](https://www.who.int/docs/default-source/coronaviruse/15042024_jn1_ure.pdf?sfvrsn=8bd19a5c_7#:~:text=Effectiveness%20of%20the%20XBB.,predicted%20to%20cross%2Drecognize%20BA)  
476 [source/coronaviruse/15042024\\_jn1\\_ure.pdf?sfvrsn=8bd19a5c\\_7#:~:text=Effectiveness](https://www.who.int/docs/default-source/coronaviruse/15042024_jn1_ure.pdf?sfvrsn=8bd19a5c_7#:~:text=Effectiveness%20of%20the%20XBB.,predicted%20to%20cross%2Drecognize%20BA)  
477 [%20of%20the%20XBB.,predicted%20to%20cross%2Drecognize%20BA](https://www.who.int/docs/default-source/coronaviruse/15042024_jn1_ure.pdf?sfvrsn=8bd19a5c_7#:~:text=Effectiveness%20of%20the%20XBB.,predicted%20to%20cross%2Drecognize%20BA). Accessed May  
478 13, 2024.
- 479 5.Link-Gelles R, Ciesla AA, Mak J, et al. Early Estimates of Updated 2023-2024 (Monovalent  
480 XBB.1.5) COVID-19 Vaccine Effectiveness Against Symptomatic SARS-CoV-2 Infection  
481 Attributable to Co-Circulating Omicron Variants Among Immunocompetent Adults -  
482 Increasing Community Access to Testing Program, United States, September 2023-  
483 January 2024. *MMWR Morb Mortal Wkly Rep.* 2024;73(4):77-83.
- 484 6.U.S. Food and Drug Administration. Updated COVID-19 Vaccines for Use in the United States  
485 Beginning in Fall 2024 [https://www.fda.gov/vaccines-blood-biologics/updated-covid-19-](https://www.fda.gov/vaccines-blood-biologics/updated-covid-19-vaccines-use-united-states-beginning-fall-2024)  
486 [vaccines-use-united-states-beginning-fall-2024](https://www.fda.gov/vaccines-blood-biologics/updated-covid-19-vaccines-use-united-states-beginning-fall-2024). Accessed September 13, 2024.
- 487 7.U.S. Food and Drug Administration. COVID-19 Vaccines. [https://www.fda.gov/emergency-](https://www.fda.gov/emergency-preparedness-and-response/coronavirus-disease-2019-covid-19/covid-19-vaccines)  
488 [preparedness-and-response/coronavirus-disease-2019-covid-19/covid-19-vaccines](https://www.fda.gov/emergency-preparedness-and-response/coronavirus-disease-2019-covid-19/covid-19-vaccines).  
489 Accessed September 25, 2024.
- 490 8.Dunkle LM, Kotloff KL, Gay CL, et al. Efficacy and Safety of NVX-CoV2373 in Adults in the  
491 United States and Mexico. *N Engl J Med.* 2022;386(6):531-543.
- 492 9.Marchese AM, Zhou X, Kinol J, et al. NVX-CoV2373 vaccine efficacy against hospitalization:  
493 A post hoc analysis of the PREVENT-19 phase 3, randomized, placebo-controlled trial.  
494 *Vaccine.* 2023;41(22):3461-3466.
- 495 10.Anez G, Dunkle LM, Gay CL, et al. Safety, Immunogenicity, and Efficacy of the NVX-  
496 CoV2373 COVID-19 Vaccine in Adolescents: A Randomized Clinical Trial. *JAMA Netw*  
497 *Open.* 2023;6(4):e239135.
- 498 11.Baden LR, El Sahly HM, Essink B, et al. Efficacy and Safety of the mRNA-1273 SARS-CoV-  
499 2 Vaccine. *N Engl J Med.* 2021;384(5):403-416.
- 500 12.Hamilton S, Zhu M, Cloney-Clark S, et al. Validation of a severe acute respiratory syndrome  
501 coronavirus 2 microneutralization assay for evaluation of vaccine immunogenicity. *J Virol*  
502 *Methods.* 2024;327:114945.
- 503 13.Zhu M, Cloney-Clark S, Feng SL, et al. A Severe Acute Respiratory Syndrome Coronavirus 2  
504 Anti-Spike Immunoglobulin G Assay: A Robust Method for Evaluation of Vaccine  
505 Immunogenicity Using an Established Correlate of Protection. *Microorganisms.*  
506 2023;11(7).

- 507 14. Plested JS, Zhu M, Cloney-Clark S, et al. Severe Acute Respiratory Syndrome Coronavirus  
508 2 Receptor (Human Angiotensin-Converting Enzyme 2) Binding Inhibition Assay: A  
509 Rapid, High-Throughput Assay Useful for Vaccine Immunogenicity Evaluation.  
510 *Microorganisms*. 2023;11(2).
- 511 15. Cai Z, Kalker R, Zhu M, et al. A Pseudovirus-Based Neutralization Assay for SARS-CoV-2  
512 Variants: A Rapid, Cost-Effective, BSL-2-Based High-Throughput Assay Useful for  
513 Vaccine Immunogenicity Evaluation. *Microorganisms*. 2024;12(3).
- 514 16. Fong Y, Huang Y, Benkeser D, et al. Immune correlates analysis of the PREVENT-19  
515 COVID-19 vaccine efficacy clinical trial. *Nat Commun*. 2023;14(1):331.
- 516 17. Heath PT, Galiza EP, Baxter DN, et al. Safety and Efficacy of the NVX-CoV2373  
517 Coronavirus Disease 2019 Vaccine at Completion of the Placebo-Controlled Phase of a  
518 Randomized Controlled Trial. *Clin Infect Dis*. 2023;76(3):398-407.
- 519 18. Mallory RM, Formica N, Pfeiffer S, et al. Safety and immunogenicity following a homologous  
520 booster dose of a SARS-CoV-2 recombinant spike protein vaccine (NVX-CoV2373): a  
521 secondary analysis of a randomised, placebo-controlled, phase 2 trial. *Lancet Infect Dis*.  
522 2022;22(11):1565-1576.
- 523 19. Follmann D, Mateja A, Fay MP, et al. Durability of Protection Against COVID-19 Through the  
524 Delta Surge for the NVX-CoV2373 Vaccine. *Clin Infect Dis*. 2024;79(1):78-85.
- 525 20. Liu X, Munro APS, Wright A, et al. Persistence of immune responses after heterologous and  
526 homologous third COVID-19 vaccine dose schedules in the UK: eight-month analyses of  
527 the COV-BOOST trial. *J Infect*. 2023;87(1):18-26.
- 528 21. Alves K, Plested JS, Galbiati S, et al. Immunogenicity and safety of a fourth homologous  
529 dose of NVX-CoV2373. *Vaccine*. 2023;41(29):4280-4286.
- 530 22. Polack FP, Thomas SJ, Kitchin N, et al. Safety and Efficacy of the BNT162b2 mRNA Covid-  
531 19 Vaccine. *N Engl J Med*. 2020;383(27):2603-2615.
- 532 23. Al-Obaydi S, Henrikus E, Mohammad N, Lehman EB, Thakur A, Al-Shaikhly T. Hesitancy  
533 and reactogenicity to mRNA-based COVID-19 vaccines-Early experience with vaccine  
534 rollout in a multi-site healthcare system. *PLoS One*. 2022;17(8):e0272691.
- 535 24. Chrissian AA, Oyoyo UE, Patel P, et al. Impact of COVID-19 vaccine-associated side effects  
536 on health care worker absenteeism and future booster vaccination. *Vaccine*.  
537 2022;40(23):3174-3181.
- 538 25. Centers for Disease Control and Prevention. People With Certain Medical Conditions.  
539 [https://www.cdc.gov/coronavirus/2019-ncov/need-extra-precautions/people-with-](https://www.cdc.gov/coronavirus/2019-ncov/need-extra-precautions/people-with-medical-conditions.html)  
540 [medical-conditions.html](https://www.cdc.gov/coronavirus/2019-ncov/need-extra-precautions/people-with-medical-conditions.html). Accessed January 31, 2024.
- 541 26. Salisbury D, Lazarus JV, Waite N, et al. COVID-19 Vaccine Preferences in General  
542 Populations in Canada, Germany, the United Kingdom, and the United States: Discrete  
543 Choice Experiment. *JMIR Public Health Surveill*. 2024;10:e57242.
- 544 27. Planas D, Staropoli I, Michel V, et al. Distinct evolution of SARS-CoV-2 Omicron XBB and  
545 BA.2.86/JN.1 lineages combining increased fitness and antibody evasion. *Nat Commun*.  
546 2024;15(1):2254.
- 547 28. Bhiman JN, Richardson SI, Lambson BE, et al. Novavax NVX-COV2373 triggers  
548 neutralization of Omicron sub-lineages. *Sci Rep*. 2023;13(1):1222.

- 549 29.Walker R. Vaccines and Related Biological Products Advisory Committee. Novavax Data in  
550 Support of 2024-2025 Vaccine Update. June 5, 2024. Available at:  
551 <https://www.fda.gov/media/179143/download>. Accessed October 20, 2024.
- 552 30.Nextstrain.org. Genomic epidemiology of SARS-CoV-2 with subsampling focused globally  
553 since pandemic start. <https://nextstrain.org/ncov/gisaid/global/all-time?m=div>. Accessed  
554 August 12, 2024.
- 555 31.Wolff MW, Murhammer DW, Jarvis DL, Linhardt RJ. Electrophoretic analysis of glycoprotein  
556 glycans produced by lepidopteran insect cells infected with an immediate early  
557 recombinant baculovirus encoding mammalian beta1,4-galactosyltransferase. *Glycoconj*  
558 *J.* 1999;16(12):753-756.
- 559 32.Chung KY, Coyle EM, Jani D, et al. ISCOMATRIX adjuvant promotes epitope spreading and  
560 antibody affinity maturation of influenza A H7N9 virus like particle vaccine that correlate  
561 with virus neutralization in humans. *Vaccine.* 2015;33(32):3953-3962.
- 562 33.Stertman L, Palm AE, Zarnegar B, et al. The Matrix-M adjuvant: A critical component of  
563 vaccines for the 21(st) century. *Human vaccines & immunotherapeutics.*  
564 2023;19(1):2189885.
- 565

**Table 1.** Demographic characteristics (PP-IMM analysis sets).

| Characteristic                            | Adult main study    |                 |                      |                      | Pediatric expansion (12 to <18 years) |                 |                      |                      |
|-------------------------------------------|---------------------|-----------------|----------------------|----------------------|---------------------------------------|-----------------|----------------------|----------------------|
|                                           | Primary series      |                 | 3 <sup>rd</sup> Dose | 4 <sup>th</sup> Dose | Primary series                        |                 | 3 <sup>rd</sup> Dose | 4 <sup>th</sup> Dose |
|                                           | NVX-CoV2373 (n=713) | Placebo (n=337) | NVX-CoV2373 (n=226)  | NVX-CoV2373 (n=160)  | NVX-CoV2373 (n=1126)                  | Placebo (n=537) | NVX-CoV2373 (n=220)  | NVX-CoV2373 (n=27)   |
| <b>Sex, n (%)</b>                         |                     |                 |                      |                      |                                       |                 |                      |                      |
| Male                                      | 364 (51.1)          | 162 (48.1)      | 117 (51.8)           | 76 (47.5)            | 584 (51.9)                            | 297 (55.3)      | 127 (57.7)           | 16 (59.3)            |
| Female                                    | 349 (48.9)          | 175 (51.9)      | 109 (48.2)           | 84 (52.5)            | 542 (48.1)                            | 240 (44.7)      | 93 (42.3)            | 11 (40.7)            |
| <b>Age (years)</b>                        |                     |                 |                      |                      |                                       |                 |                      |                      |
| Mean (SD)                                 | 57.1 (15.69)        | 56.5 (16.81)    | 49.6 (14.17)         | 58.7 (13.89)         | 13.8 (1.39)                           | 13.7 (1.42)     | 14.1 (1.51)          | 13.2 (1.22)          |
| Median (range)                            | 64.0 (18–95)        | 65.0 (18–85)    | 52.0 (19–79)         | 62.0 (19–84)         | 14.0 (12–17)                          | 14.0 (12–17)    | 14.0 (12–17)         | 13.0 (12–17)         |
| <b>Age group (years), n (%)</b>           |                     |                 |                      |                      |                                       |                 |                      |                      |
| 18–64                                     | 358 (50.2)          | 168 (49.9)      | 196 (86.7)           | 91 (56.9)            | N/A                                   | N/A             | N/A                  | N/A                  |
| ≥65                                       | 355 (49.8)          | 169 (50.1)      | 30 (13.3)            | 69 (43.1)            | N/A                                   | N/A             | N/A                  | N/A                  |
| 12 to <15                                 | N/A                 | N/A             | N/A                  | N/A                  | 766 (68.0)                            | 368 (68.5)      | 118 (53.6)           | 23 (85.2)            |
| 15 to <18                                 | N/A                 | N/A             | N/A                  | N/A                  | 360 (32.0)                            | 169 (31.5)      | 102 (46.4)           | 4 (14.8)             |
| <b>Region, n (%)</b>                      |                     |                 |                      |                      |                                       |                 |                      |                      |
| Mexico                                    | 48 (6.7)            | 23 (6.8)        | 0                    | 0                    | 0                                     | 0               | 0                    | 0                    |
| United States                             | 665 (93.3)          | 314 (93.2)      | 226 (100)            | 160 (100)            | 1126 (100)                            | 537 (100)       | 220 (100)            | 27 (100)             |
| <b>Race, n (%)</b>                        |                     |                 |                      |                      |                                       |                 |                      |                      |
| White                                     | 571 (80.1)          | 257 (76.3)      | 187 (82.7)           | 134 (83.8)           | 866 (76.9)                            | 402 (74.9)      | 186 (84.5)           | 22 (81.5)            |
| Black or African American                 | 62 (8.7)            | 46 (13.6)       | 21 (9.3)             | 13 (8.1)             | 142 (12.6)                            | 69 (12.8)       | 12 (5.5)             | 3 (11.1)             |
| Asian                                     | 19 (2.7)            | 14 (4.2)        | 13 (5.8)             | 6 (3.8)              | 34 (3.0)                              | 23 (4.3)        | 7 (3.2)              | 0                    |
| American Indian or Alaska Native          | 8 (6.7)             | 16 (4.7)        | 1 (0.4)              | 5 (3.1)              | 13 (1.2)                              | 6 (1.1)         | 1 (0.5)              | 0                    |
| Mixed Origin                              | 10 (1.4)            | 2 (0.6)         | 3 (1.3)              | 2 (1.3)              | 63 (5.6)                              | 33 (6.1)        | 12 (5.5)             | 1 (3.7)              |
| Native Hawaiian or Other Pacific Islander | 0                   | 1 (0.3)         | 1 (0.4)              | 0                    | 3 (0.3)                               | 1 (0.2)         | 1 (0.5)              | 0                    |
| Not Reported                              | 3 (0.4)             | 1 (0.3)         | 0                    | 0                    | 5 (0.4)                               | 3 (0.6)         | 1 (0.5)              | 1 (3.7)              |
| <b>Ethnicity, n (%)</b>                   |                     |                 |                      |                      |                                       |                 |                      |                      |
| Hispanic or Latino                        | 142 (19.9)          | 60 (17.8)       | 34 (15.0)            | 9 (5.6)              | 175 (15.5)                            | 87 (16.2)       | 36 (16.4)            | 6 (22.2)             |
| Not Hispanic or Latino                    | 570 (79.9)          | 277 (82.2)      | 192 (85.0)           | 151 (94.4)           | 947 (84.1)                            | 450 (83.8)      | 184 (83.6)           | 20 (74.1)            |
| Not reported/unknown                      | 1 (0.1)             | 0               | 0                    | 0                    | 4 (0.4)                               | 0               | 0                    | 1 (3.7)              |

SD, standard deviation. Note: Demographic and clinical characteristics are shown for the total PP-IMM set and were not developed for individual PP-IMM subsets.

## Figure legends

### Figure 1. CONSORT diagram.

Participant enrollment and disposition for adult and adolescent populations. (A) Primary series and crossover. (B) Dose expansion.

Part of this figure was adapted from Añez G, et al. *JAMA Netw Open*. 2023;6(4):e239135.

\*Other reasons include receipt of another COVID-19 vaccine, noncompliance, investigator decision, incarceration, and pregnancy. †Participants could have more than one reason for exclusion. ‡Participants with an immunogenicity sample after the 3rd dose were a combination of those who received 2 doses of NVX-CoV2373 in the initial series and those who received 2 doses during blinded crossover. §Three participants were excluded from the adult 4<sup>th</sup>-dose safety analysis set due to receipt of an external COVID-19 vaccine or an extra dose of NVX-CoV2373; three participants excluded from the adolescent PP-IMM set who received only 3 doses of NVX-CoV2373 are included in the 4<sup>th</sup>-dose safety analysis set.

### Figure 2. nAb responses against the ancestral strain in PP-IMM analysis sets. A) Adults. B) Adolescents. C) Noninferiority comparison of nAb responses after the primary series and 3rd dose.

Baseline/pre-dose are defined as the last available assessment prior to administration of trial vaccine for the 1st, 3rd, or 4th dose. Post dose is 14 days (Day 35) after the primary series and 28 days after the 3rd or 4th dose. GMFR was calculated based on titer comparison of respective post vaccination and baseline samples for each group. SCR was calculated based on the number of participants with a  $\geq 4$ -fold increase in antibody concentration from baseline divided by the number of participants with a sample collected at the designated post vaccination time. GMFR and SCR values with 95% CIs are noted. To establish noninferiority, the following criteria were to be met: lower bound (LB) of two-sided 95% CI for the ratio of GMTs ( $\text{GMT}_{\text{third}}/\text{GMT}_{\text{primary}} > 1.0$ ); and LB of the two-sided 95% CI for the difference of SCR ( $\text{GMT}_{\text{third}} - \text{GMT}_{\text{primary}} > -10\%$ ). Responses are compared 14 days (Day 35) after the primary series and 28 days after the 3rd dose. Criteria boundaries for 95% CI are marked with a dashed vertical line. GMT, geometric mean titer; LB, lower bound; nAb, neutralizing antibody; SCR, seroconversion rate.

### Figure 3. Immunogenicity in an adult PP-IMM subset against the ancestral strain, BA.5, and BQ.1.1 before and after the primary series, 3<sup>rd</sup> dose, and 4<sup>th</sup> dose.

A) Pseudovirus neutralization assay (n=15 participants for each timepoint and strain).  
B) Anti-rS IgG responses regardless of baseline SARS-CoV-2 serostatus (n=40 participants for each timepoint and strain, other than for 38 participants for 28 days after the 4<sup>th</sup> dose).  
C) Anti-rS IgG responses by baseline SARS-CoV-2 serostatus (n=20 participants for each timepoint and strain, other than for 18 participants for 28 days after the 4<sup>th</sup> dose).  
Fold differences compared with the ancestral strain for each series are shown in brackets. GMFR are comparing GMTs from samples collected on the day of dosing (before vaccination) with samples collected 28 days after that same dose. CoP values in (B) were determined for the ancestral strain based on Day 35 anti-rS IgG levels with protection 56 days later (Fong et al 2022). CoP, correlate of protection; GMFR, geometric mean fold rise; GMT, geometric mean titer; SCR, seroconversion rate.



**Figure 4.** Reactogenicity within 7 days of each study dose.

Solicited (A) local and (B) systemic treatment-emergent adverse events were collected in adult (top) and adolescent (bottom) participants in the safety analysis sets with at least one eDiary entry. Note: There are no placebo reactogenicity data beyond the primary series as subsequent doses of placebo were not administered.

Figure 1. CONSORT diagram.

A

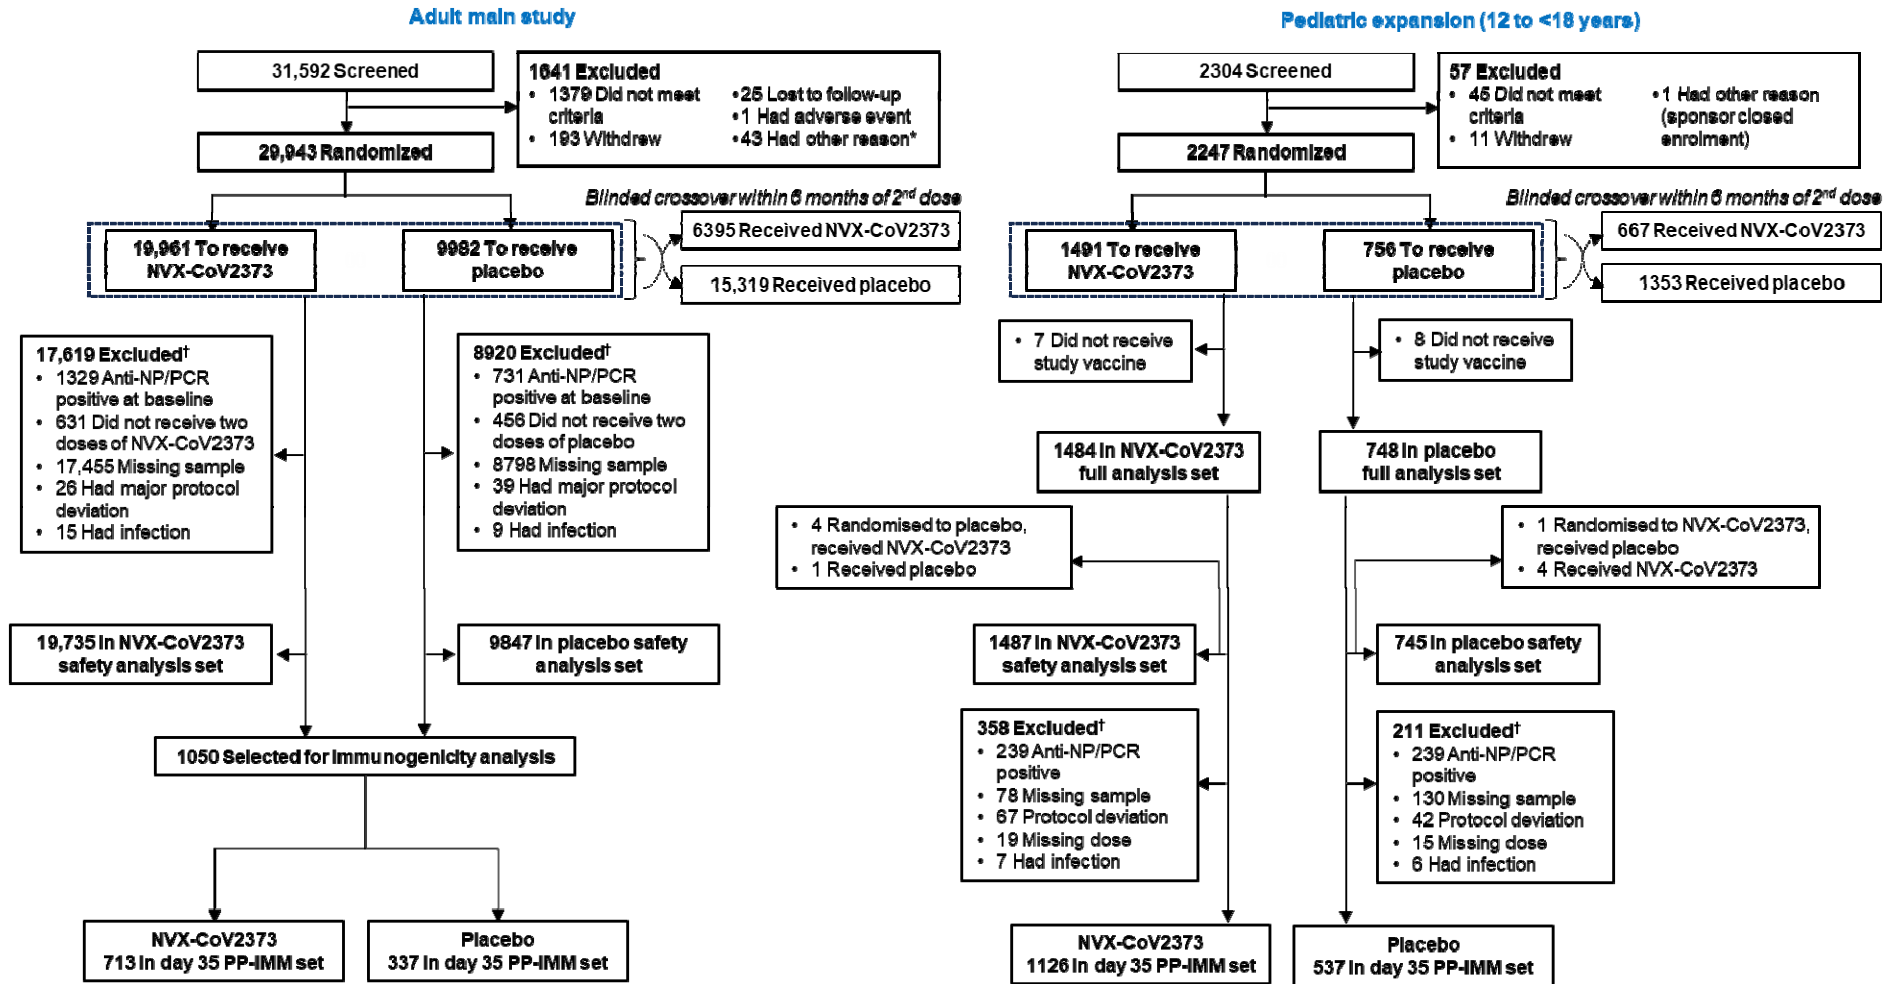

B

**Adult booster dose amendment**

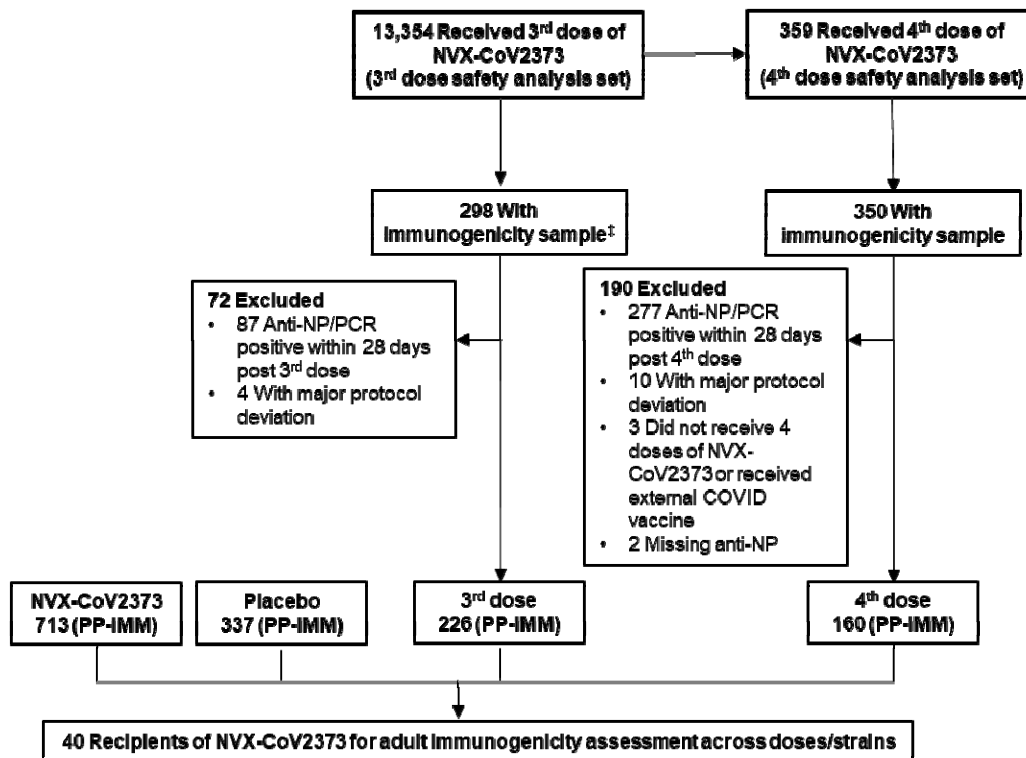

**Pediatric expansion (12 to <18 years)**

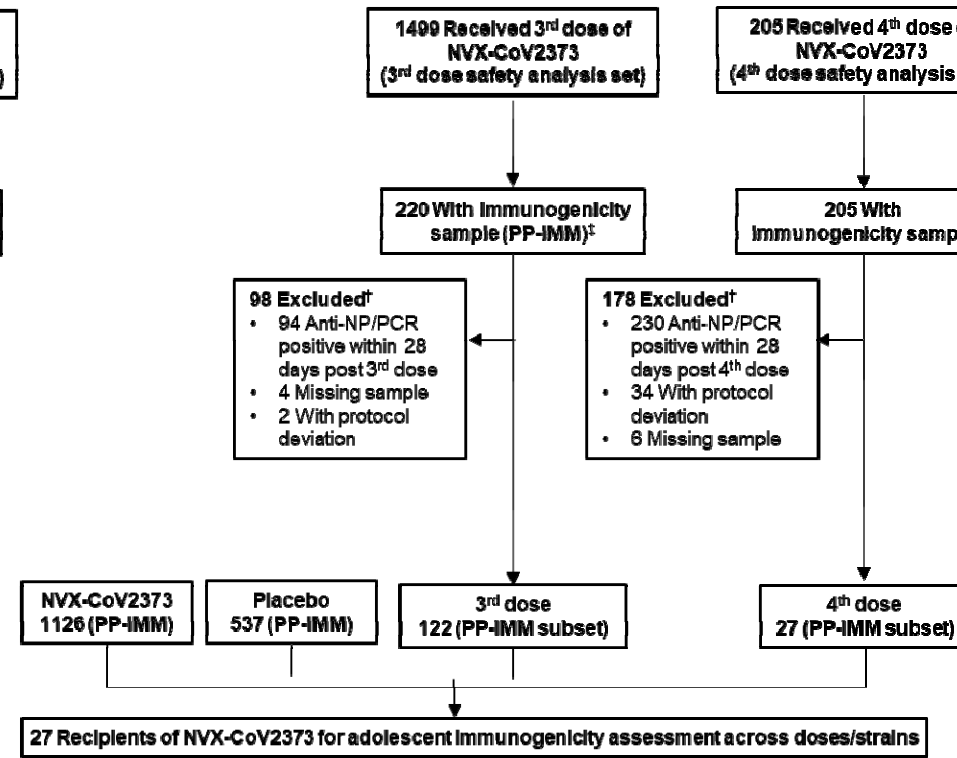

**Figure 2.** Neutralizing antibody responses to the ancestral strain before and after the primary series, 3<sup>rd</sup>, and 4<sup>th</sup> doses (PP-IMM analysis sets).

**A. Adults**

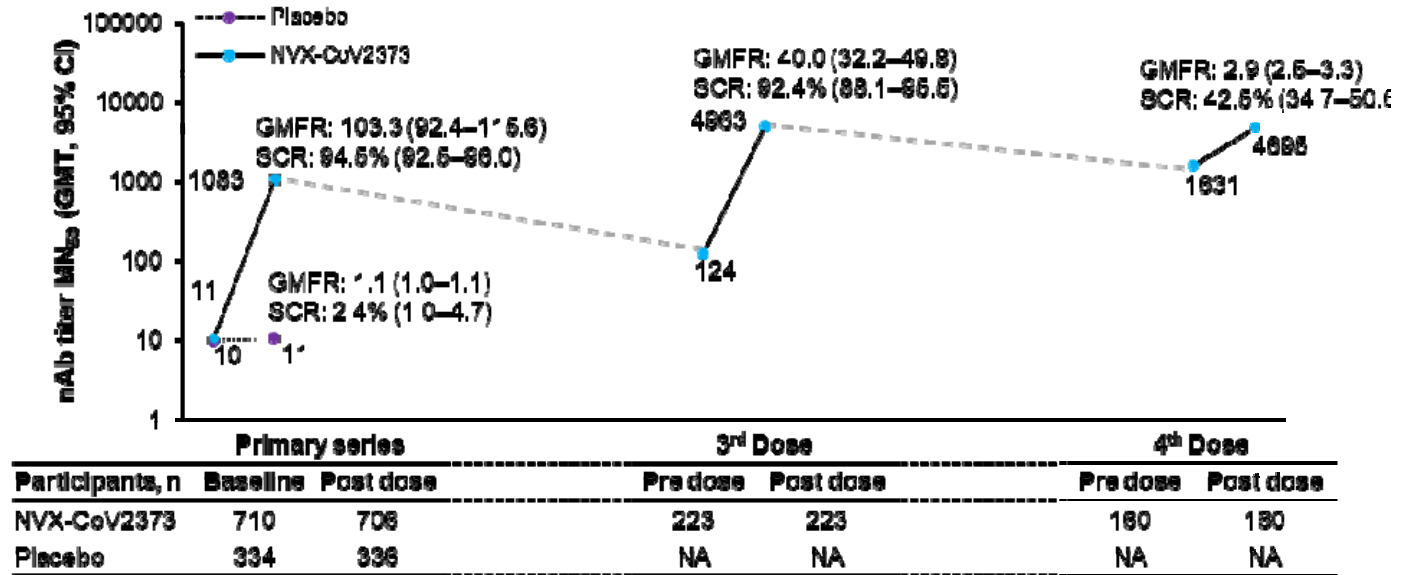

**B. Adolescents**

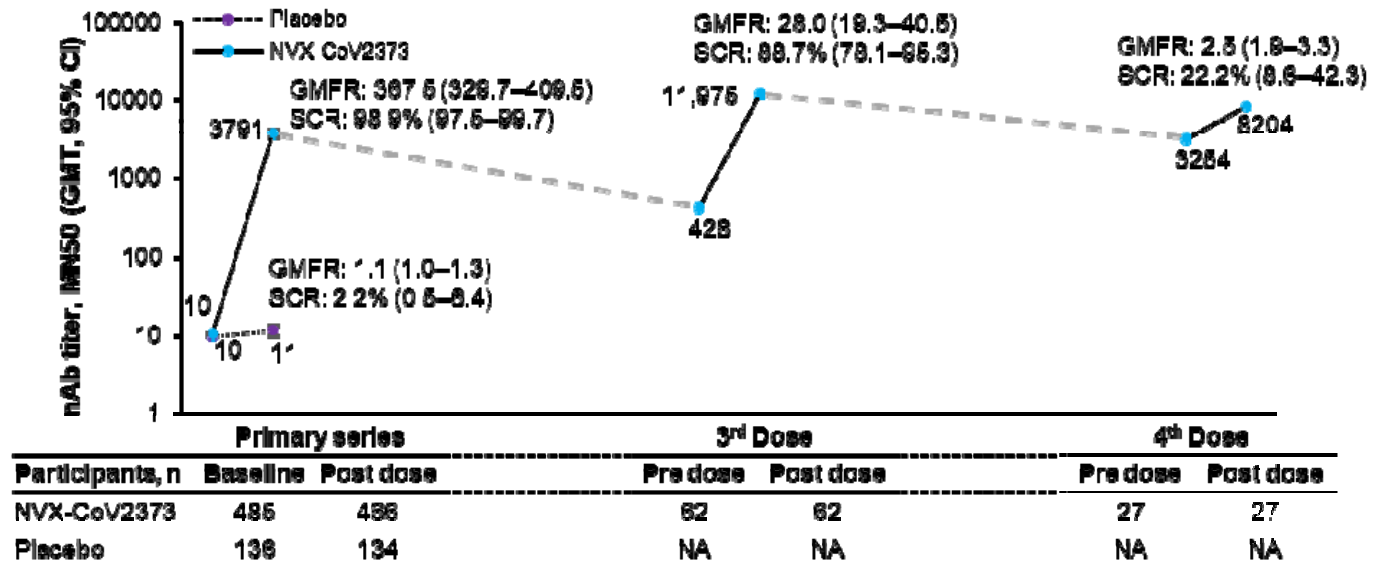

C. Noninferiority comparison of nAb responses after the primary series and 3<sup>rd</sup> dose.

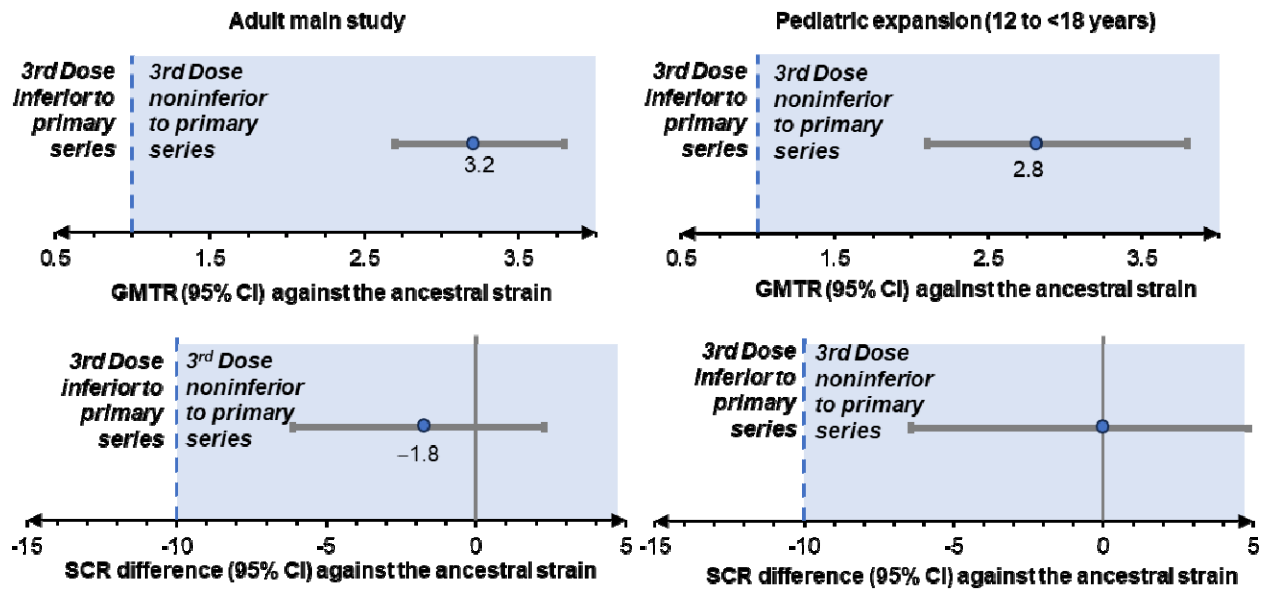

**Figure 3.** Immunogenicity in an adult PP-IMM subset against the ancestral strain, BA.5, and BQ.1.1 before and after the primary series, 3<sup>rd</sup> dose, and 4<sup>th</sup> dose.

A) Pseudovirus neutralization assay (n=15 participants for each timepoint and strain).

B) Anti-rS IgG responses regardless of baseline SARS-CoV-2 serostatus (n=40 participants for each timepoint and strain, other than for 38 participants for 28 days after the 4<sup>th</sup> dose).

C) Anti-rS IgG responses by baseline SARS-CoV-2 serostatus (n=20 participants for each timepoint and strain, other than for 18 participants for 28 days after the 4<sup>th</sup> dose).

Fold differences compared to the ancestral strain for each series are shown with brackets. GMFR are comparing GMTs from samples collected on the day of dosing (before vaccination), to samples collected 28 days after that same dose. CoP in (B) were determined for the ancestral strain based on Day 35 anti-rS IgG levels with protection 56 days later (Fong et al 2022). CoP, correlate of protection; GMFR, geometric mean fold rise; GMT, geometric mean titer; SCR, seroconversion rate.

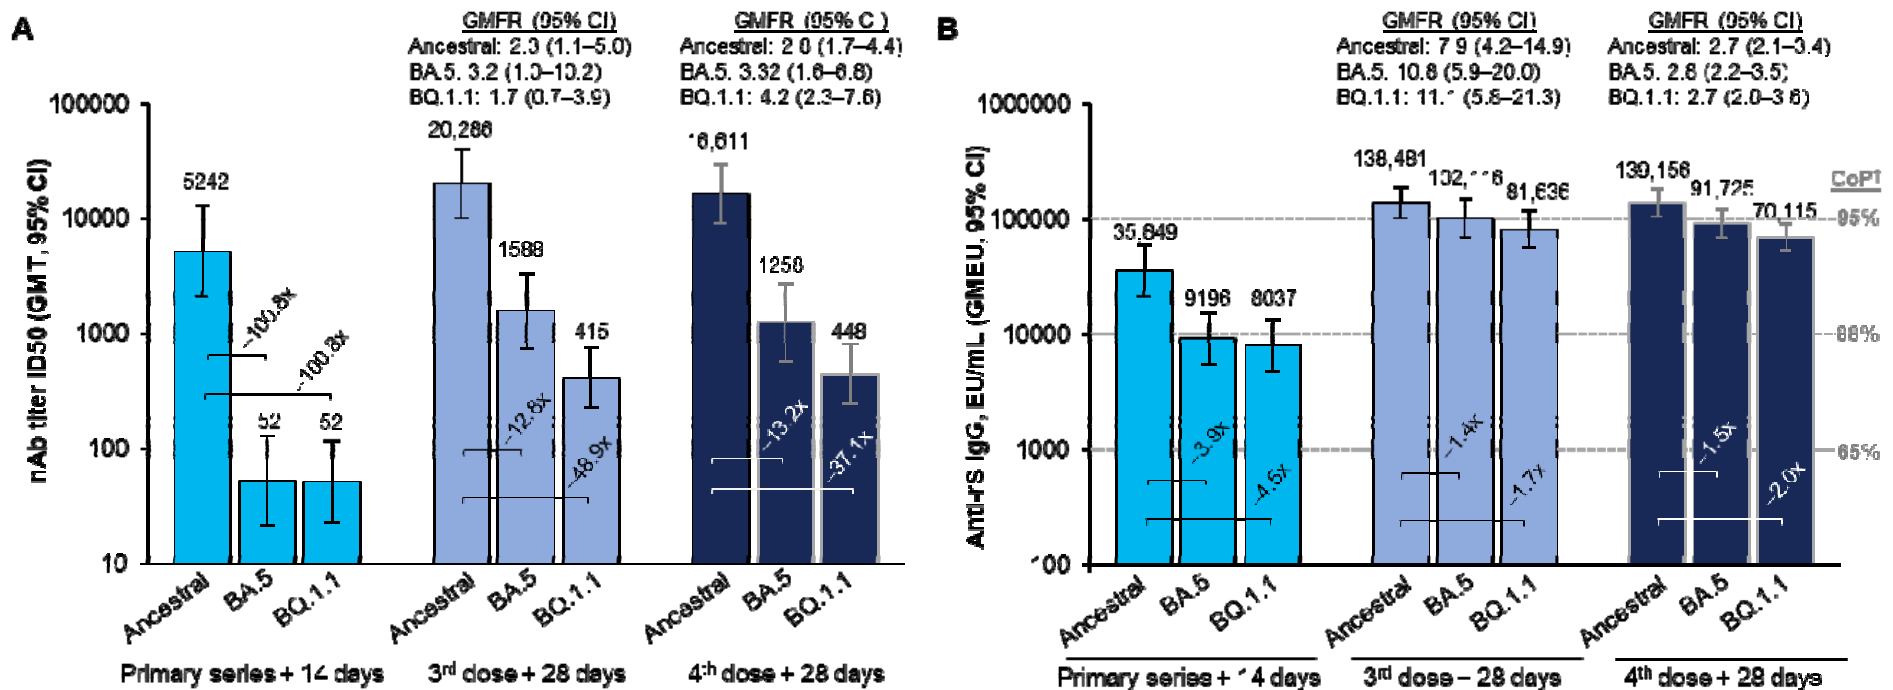

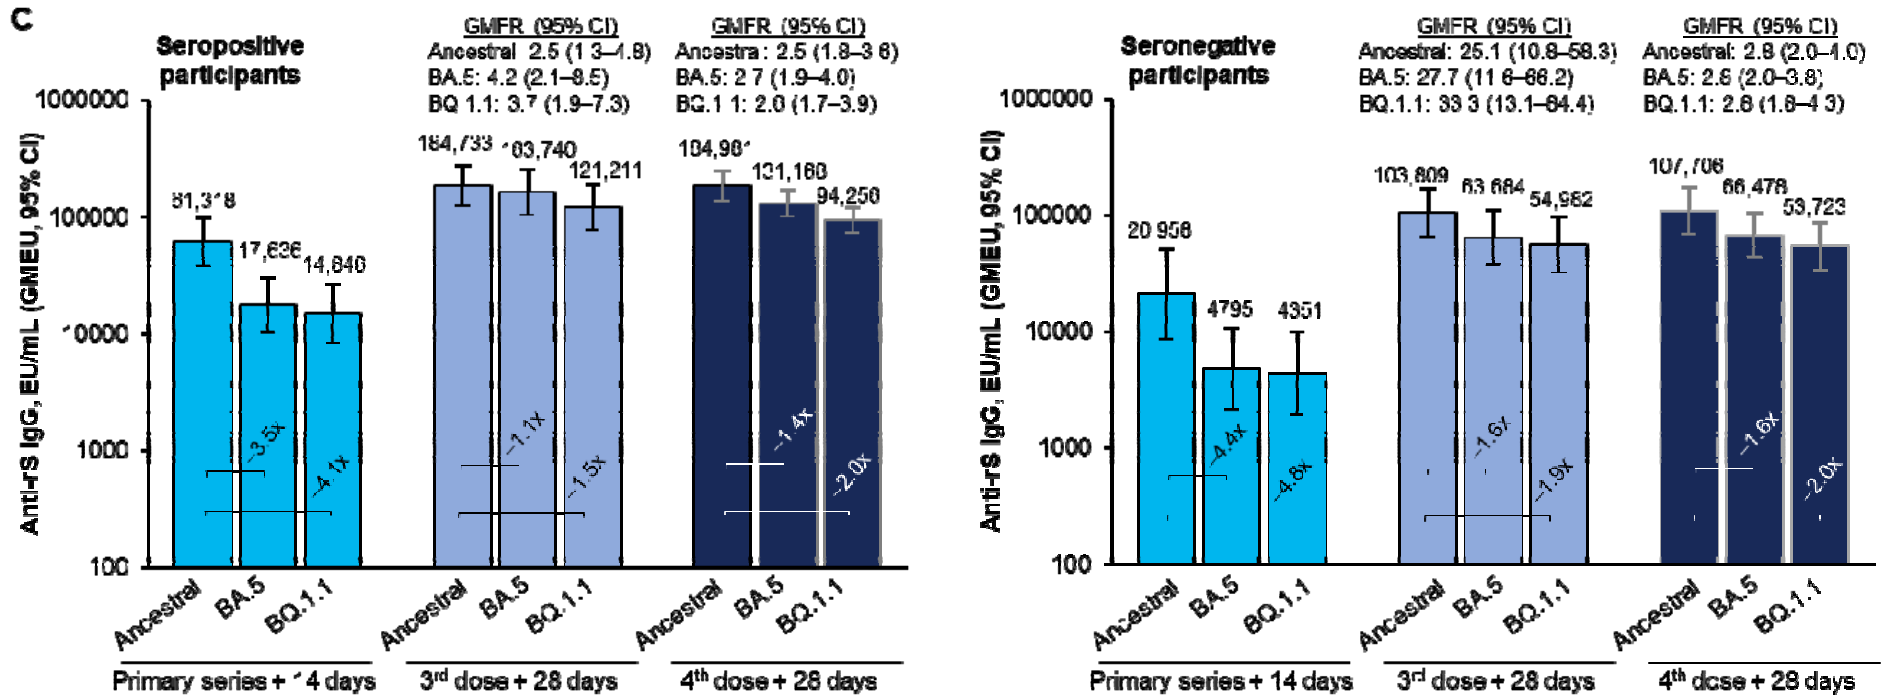

**Figure 4.** Proportion of participants with solicited (A) local and (B) systemic TEAEs within 7 days of each dose of NVX-CoV2373.

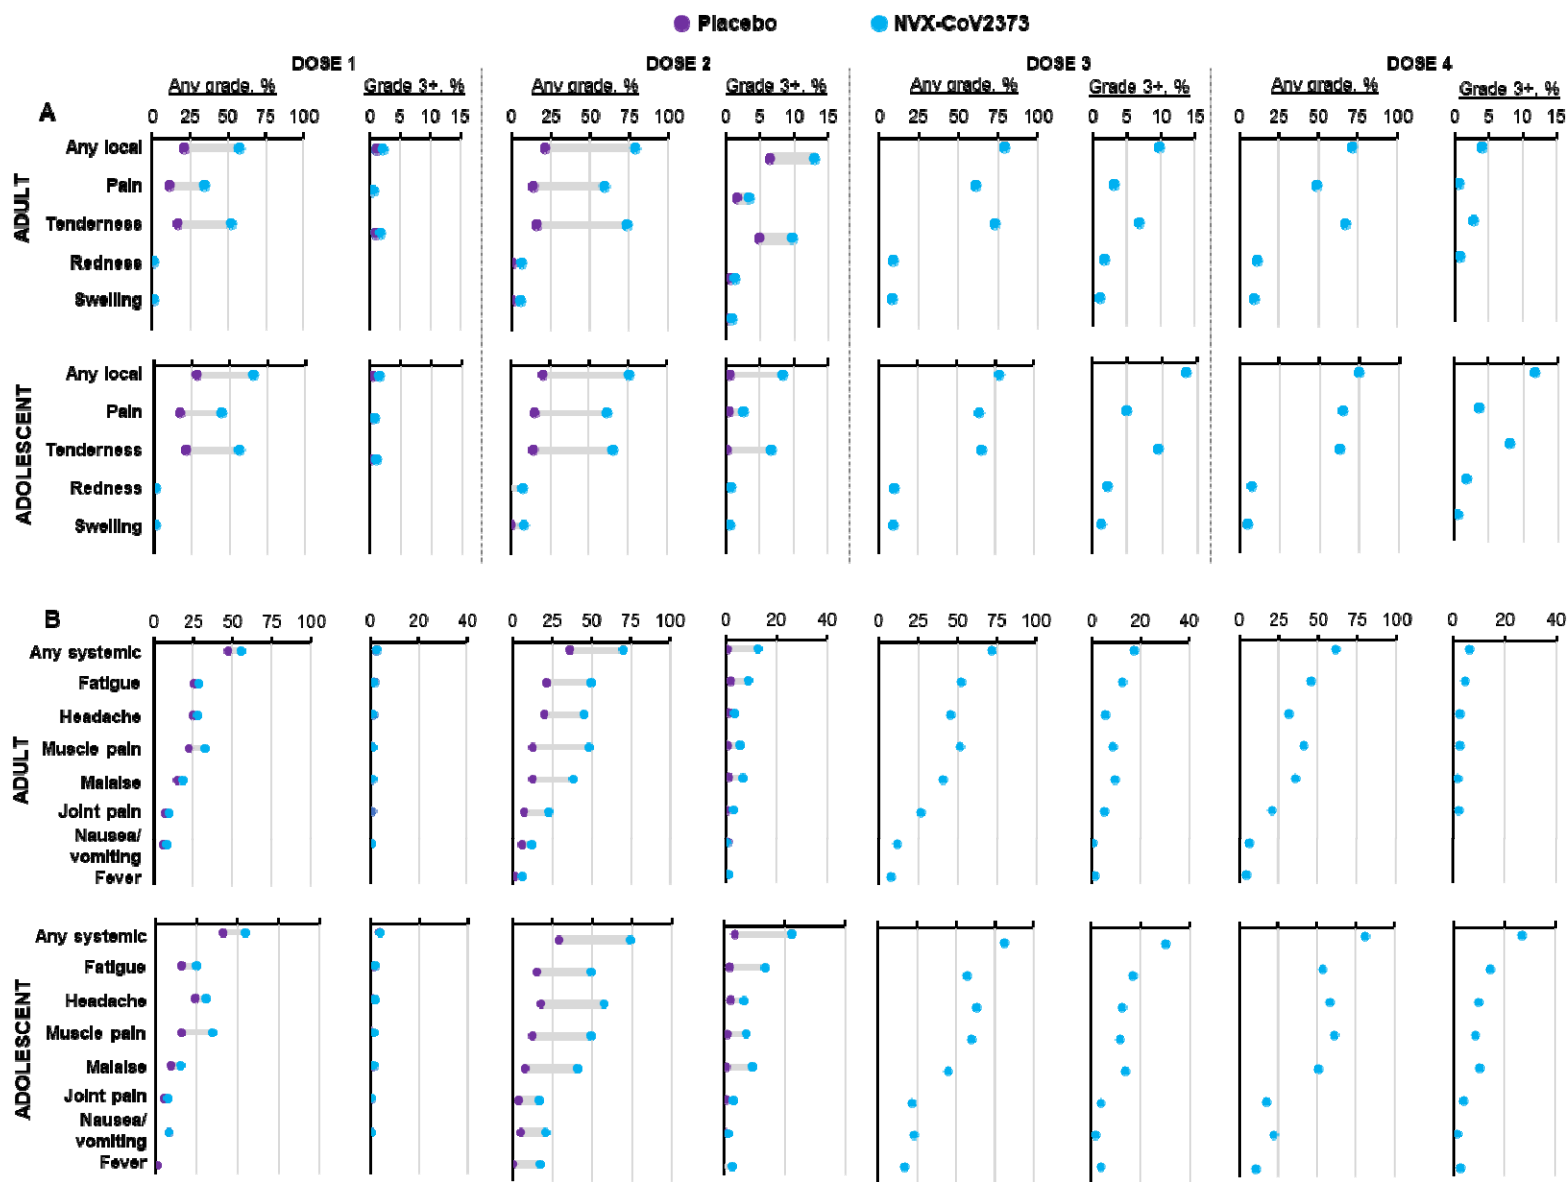

Source: https://medrxiv.org/content/10.1101/2024.11.07.24316930v1.full.pdf
